# Supplementary material
Source: MDPI journal article supplement (https://www.mdpi.com/2071-1050/14/21/13857)
Supplement: s1 [file s1]

# Supplementary Materials

**Table S1: The effect of agricultural products export and openness of trade on environmental quality in different models**

| Dep.var                            | Developed countries |        |       | Developing countries |        |       |
|------------------------------------|---------------------|--------|-------|----------------------|--------|-------|
|                                    | FE                  | EC2SLS | G2SLS | FE                   | EC2SLS | G2SLS |
| Total agricultural exports (US \$) | N <sub>2</sub> O    | ***    | +     | ***                  | +      | +     |
| Raw agricultural exports           | CH <sub>4</sub>     | -      | ***   | ***                  | +      | +     |
| Openness (US \$)                   | N <sub>2</sub> O    | ***    | +     | ***                  | +      | +     |
|                                    | CH <sub>4</sub>     | -      | ***   | ***                  | +      | +     |

\*, \*\*, \*\*\* denote significant level in 10%, 5% and 1% level.

**Table S2: Selection process of suitable model**

| Reg. models for separate the export endogenous variable and openness variable | Dependent Variable | developed countries |        |         | developing countries |        |         |
|-------------------------------------------------------------------------------|--------------------|---------------------|--------|---------|----------------------|--------|---------|
|                                                                               |                    | stage 1             |        | stage 2 | stage 1              |        | stage 2 |
|                                                                               |                    | Hausman             | EC2SLS | G2SLS   | Hausman              | EC2SLS | G2SLS   |
| Reg. equation 1: total agricultural exports                                   | N <sub>2</sub> O   | 175.00***           | -      | -       | 43.42***             | -      | -       |
|                                                                               | CH <sub>4</sub>    | -57.37              | -      | -       | 18.00**              | -      | -       |
| Reg. equation 2: raw agricultural exports                                     | N <sub>2</sub> O   | 53.31***            | -      | -       | 9.89                 | 58.40  | 58.32   |
|                                                                               | CH <sub>4</sub>    | -51.95              | -      | -       | 3.14                 | 0.5057 | 0.5179  |
| Reg. equation 3: Openness                                                     | N <sub>2</sub> O   | 92.61***            | -      | -       | 17.55**              | -      | -       |
|                                                                               | CH <sub>4</sub>    | -40.70              | -      | -       | 13.92*               | -      | -       |

\*, \*\*, \*\*\* denote significant level in 10%, 5% and 1% level.

**Table S3: The total agricultural exports effects on environmental quality- first stage results**

| Independent variables (exogenous) | Developed countries |                    | Developing countries |                    |
|-----------------------------------|---------------------|--------------------|----------------------|--------------------|
|                                   | CH <sub>4</sub>     | N <sub>2</sub> O   | CH <sub>4</sub>      | N <sub>2</sub> O   |
|                                   | (fixed effects)     | (fixed effects)    | (fixed effects)      | (fixed effects)    |
| Agricultural land                 | -1.86***<br>(0.35)  | -1.28***<br>(0.34) | 0.60**<br>(0.27)     | 0.60**<br>(0.27)   |
| Agricultural machinery            | 0.02<br>(0.09)      | 0.18**<br>(0.08)   | 0.35***<br>(0.04)    | 0.35***<br>(0.04)  |
| GDP per capita                    | 0.24**<br>(4.07)    | -6.19**<br>(2.63)  | -2.74***<br>(0.89)   | -2.74***<br>(0.89) |

|                         |                   |                     |                   |                   |
|-------------------------|-------------------|---------------------|-------------------|-------------------|
| GDP per capita squared  | 0.07<br>(0.20)    | 0.40**<br>(0.13)    | 0.28***<br>(0.05) | 0.28***<br>(0.05) |
| Agriculture value added | -0.42**<br>(0.10) | 0.13<br>(0.10)      | 0.68***<br>(0.12) | 0.68***<br>(0.12) |
| Agriculture employment  | -0.90**<br>(0.10) | -1.05***<br>(0.09)  | 0.00<br>(0.00)    | 0.00<br>(0.00)    |
| FDI                     | -0.01<br>(0.01)   | -0.00<br>(0.01)     | 0.03<br>(0.01)    | 0.03<br>(0.02)    |
| education               | -0.01<br>(0.14)   | 0.03<br>(0.13)      | 0.03***<br>(0.01) | 0.03***<br>(0.01) |
| constant                | 31.92<br>(20.84)  | 37.51***<br>(12.49) | -2.78<br>(4.24)   | -2.78<br>(4.24)   |
| Number of observations  | 405               | 405                 | 765               | 765               |

**Table S4: Raw agricultural exports effects on environmental quality- first stage results**

| Independent variables<br>(exogenous) | Developed countries |                    | Developing countries |                   |
|--------------------------------------|---------------------|--------------------|----------------------|-------------------|
|                                      | CH <sub>4</sub>     | N <sub>2</sub> O   | CH <sub>4</sub>      | N <sub>2</sub> O  |
|                                      | (fixed effects)     | (fixed effects)    | (fixed effects)      | (fixed effects)   |
| Agricultural land                    | -1.40***<br>(0.35)  | -1.40**<br>(0.35)  | 0.62**<br>(0.26)     | 0.17***<br>(0.34) |
| Agricultural machinery               | 0.18**<br>(0.09)    | 0.18**<br>(0.09)   | 0.36***<br>(0.04)    | 0.37***<br>(0.06) |
| GDP per capita                       | -10.31**<br>(4.14)  | -10.31**<br>(4.14) | -2.77***<br>(0.88)   | 1.61<br>(1.14)    |
| GDP per capita squared               | 0.60***<br>(0.20)   | 0.60***<br>(0.20)  | 0.28***<br>(0.05)    | -0.04<br>(0.07)   |
| Agriculture value added              | 0.08<br>(0.10)      | 0.09<br>(0.10)     | 0.68***<br>(0.12)    | 0.05<br>(0.15)    |
| Agriculture employment               | -1.00***<br>(0.10)  | -1.00***<br>(0.10) | 0.00<br>(0.00)       | 0.00<br>(0.00)    |
| FDI                                  | -0.00<br>(0.01)     | -0.00<br>(0.01)    | 0.03<br>(0.02)       | 0.07***<br>(0.02) |
| education                            | -0.03<br>(0.14)     | -0.03<br>(0.14)    | 0.03***<br>(0.01)    | 0.02*<br>(0.01)   |
| constant                             | 22.35*<br>(13.09)   | 22.35*<br>(13.09)  | -2.71<br>(4.13)      | 8.72<br>(5.39)    |
| Number of observations               | 405                 | 405                | 765                  | 765               |

**Table S5: The total agricultural exports effects on environmental quality with openness of trade- first stage results**

| Independent variables<br>(exogenous) | Developed countries |                     | Developing countries |                    |
|--------------------------------------|---------------------|---------------------|----------------------|--------------------|
|                                      | CH <sub>4</sub>     | N <sub>2</sub> O    | CH <sub>4</sub>      | N <sub>2</sub> O   |
|                                      | (fixed effects)     | (fixed effects)     | (fixed effects)      | (fixed effects)    |
| Agricultural land                    | -1.37***<br>(0.31)  | -1.37***<br>(0.31)  | 0.48*<br>(0.26)      | 0.48*<br>(0.26)    |
| Agricultural machinery               | 0.18**<br>(0.08)    | 0.18**<br>(0.08)    | 0.34***<br>(0.04)    | 0.34***<br>(0.04)  |
| GDP per capita                       | -10.02***<br>(3.67) | -10.02***<br>(3.67) | -2.73***<br>(0.86)   | -2.73***<br>(0.86) |
| GDP per capita squared               | 0.54**<br>(0.18)    | 0.54**<br>(0.18)    | 0.28***<br>(0.05)    | 0.28***<br>(0.05)  |
| Openness trade                       | 1.22***<br>(0.12)   | 1.22***<br>(0.12)   | 0.44***<br>(0.11)    | 0.44***<br>(0.11)  |
| Agriculture value added              | 0.04<br>(0.09)      | 0.04<br>(0.09)      | 0.64***<br>(0.11)    | 0.64***<br>(0.11)  |
| Agriculture employment               | -0.84***<br>(0.09)  | -0.84***<br>(0.09)  | -0.00<br>(0.00)      | -0.00<br>(0.00)    |
| FDI                                  | -0.00<br>(0.01)     | -0.00<br>(0.01)     | 0.02<br>(0.02)       | 0.02<br>(0.02)     |
| education                            | 0.06<br>(0.12)      | 0.06<br>(0.12)      | 0.03***<br>(0.01)    | 0.03***<br>(0.01)  |
| constant                             | 28.73**<br>(11.34)  | 59.81***<br>(18.78) | -3.15<br>(4.08)      | -3.11<br>(4.17)    |
| Number of observations               | 405                 | 405                 | 765                  | 765                |

**Table S6: Collinearity test results**

| Variable                | 1/VIF | VIF  |
|-------------------------|-------|------|
| Agricultural land       | 0.295 | 3.39 |
| Agricultural machinery  | 0.487 | 2.05 |
| Agriculture value added | 0.225 | 4.44 |
| Agriculture employment  | 0.259 | 3.86 |
| FDI                     | 0.353 | 2.83 |
| Education level         | 0.283 | 3.53 |
| GDP per capita          | 0.187 | 5.34 |
| GDP per capita squared  | 0.502 | 1.99 |
| Trade openness          | 0.292 | 3.43 |

---

|      |      |
|------|------|
| Mean | 3.43 |
|------|------|

---

**Table S7: Heteroscedasticity test results**

| Test type                                      | Test statistic | prob |
|------------------------------------------------|----------------|------|
| LR test results for developing countries model | 3.26           | 0.26 |
| LR test results for developed countries model  | 2.78           | 0.38 |
